# Supplementary material for: Dpp and Hedgehog promote the glial response to neuronal apoptosis in the developing Drosophila visual system
Source: PubMed Central journal article supplement (PMC8396793; doi:10.1371/journal.pbio.3001367), 2021-08-11
Supplement: pbio.3001367.s027.pdf [file pbio.3001367.s027.pdf]

## Tables statistical analysis

**Table A**

**Fig 1**

| Graph (panel) assay<br>Control Genotype (n= discs analysed)<br>(Mean $\pm$ Std Error M) |  | vs | Test Genotype (n)<br>(Mean $\pm$ Std Error M)                                  | Test                | p Value |
|-----------------------------------------------------------------------------------------|--|----|--------------------------------------------------------------------------------|---------------------|---------|
| <b>Graph (G) Glial density</b>                                                          |  |    |                                                                                |                     |         |
| <i>GMR-Gal4 tub-Gal80<sup>ts</sup>/+</i> (47)<br>(0.0099 $\pm$ 0.0003)                  |  | vs | <i>UAS-rpr/+ GMR-Gal4 tub-Gal80<sup>ts</sup></i> (39)<br>(0.019 $\pm$ 0.00045) | Mann-Whitney U-Test | <0.0001 |
| <b>Graph (H) Glial migration</b>                                                        |  |    |                                                                                |                     |         |
| <i>GMR-Gal4 tub-Gal80<sup>ts</sup>/+</i> (27)<br>(-3.44 $\pm$ 0.32)                     |  | vs | <i>UAS-rpr/+ GMR-Gal4 tub-Gal80<sup>ts</sup></i> (39)<br>(0.61 $\pm$ 0.22)     | Mann-Whitney U-Test | <0.0001 |

**Table B****Fig 2**

| Graph (panel) assay<br>Control Genotype (n= discs analysed)<br>(Mean ± Std Error M) | vs | Test Genotype (n)<br>(Mean ± Std Error M)                                    | Test                | p Value    |
|-------------------------------------------------------------------------------------|----|------------------------------------------------------------------------------|---------------------|------------|
| <b>Graph (I) Glial density</b>                                                      |    |                                                                              |                     |            |
| <i>GMR-Gal4 tub-Gal80<sup>ts</sup>/+</i> (28)<br>(0.01±0.00033)                     | vs | T0 <i>UAS-rpr/+ GMR-Gal4 tub-Gal80<sup>ts</sup>/+</i> (11)<br>(0.015±0.0009) | One-Way ANOVA       | <0.0001    |
| <i>GMR-Gal4 tub-Gal80<sup>ts</sup>/+</i> (28)<br>(0.01±0.00033)                     | vs | T1 <i>UAS-rpr/+ GMR-Gal4 tub-Gal80<sup>ts</sup>/+</i> (7)<br>(0.014±0.00033) | One-Way ANOVA       | 0.0062     |
| <i>GMR-Gal4 tub-Gal80<sup>ts</sup>/+</i> (28)<br>(0.01±0.00033)                     | vs | T2 <i>UAS-rpr/+ GMR-Gal4 tub-Gal80<sup>ts</sup>/+</i> (10)<br>(0.016±0.0013) | One-Way ANOVA       | <0.0001    |
| <b>Graph (J) Glial density</b>                                                      |    |                                                                              |                     |            |
| <i>GMR-Gal4 tub-Gal80<sup>ts</sup>/+</i> (11)                                       | vs | T0 <i>UAS-rpr/+ GMR-Gal4 tub-Gal80<sup>ts</sup>/+</i> (9)                    | Mann-Whitney U-Test |            |
| Apical (0.00±0.00)                                                                  |    | (0.0012±0.00011)                                                             |                     | <0.0001    |
| Middle (0.00±0.00)                                                                  |    | (0.0043±0.00033)                                                             |                     | <0.0001    |
| Basal (0.01±0.00054)                                                                |    | (0.0094±0.00068)                                                             |                     | ns (0.294) |
| Total (0.01±0.00054)                                                                |    | (0.015±0.00094)                                                              |                     | 0.0042     |
| <b>Graph (K) Glial density</b>                                                      |    |                                                                              |                     |            |
| <i>GMR-Gal4 tub-Gal80<sup>ts</sup>/+</i> (9)                                        | vs | T1 <i>UAS-rpr/+ GMR-Gal4 tub-Gal80<sup>ts</sup>/+</i> (7)                    | Mann-Whitney U-Test |            |

|                                |                                               |    |                                                            |                     |            |
|--------------------------------|-----------------------------------------------|----|------------------------------------------------------------|---------------------|------------|
| Apical                         | (0.00±0.00)                                   |    | (0.0078±0.00058)                                           |                     | <0.0001    |
| Middle                         | (0.00±0.00)                                   |    | (0.0045±0.00032)                                           |                     | <0.0001    |
| Basal                          | (0.0092±0.00027)                              |    | (0.0078±0.00058)                                           |                     | ns (0.549) |
| Total                          | (0.0092±0.00027)                              |    | (0.014±0.00033)                                            |                     | 0.0002     |
| <b>Graph (L) Glial density</b> |                                               |    |                                                            |                     |            |
|                                | <i>GMR-Gal4 tub-Gal80<sup>ts</sup>/+</i> (10) | vs | T2 <i>UAS-rpr/+ GMR-Gal4 tub-Gal80<sup>ts</sup>/+</i> (10) | Mann-Whitney U-Test |            |
| Basal                          | (0.011±0.0006)                                |    | (0.016±0.00132)                                            |                     | 0.0005     |
| Total                          | (0.011±0.0006)                                |    | (0.016±0.00132)                                            |                     | 0.0005     |
| <b>Graph (O) eye size</b>      |                                               |    |                                                            |                     |            |
|                                | <i>GMR-Gal4 tub-Gal80<sup>ts</sup>/+</i> (7)  | vs | <i>UAS-rpr/+ GMR-Gal4 tub-Gal80<sup>ts</sup>/+</i> (7)     | Mann-Whitney U-Test | ns (0.053) |
|                                | (146805±2784)                                 |    | (136685±3249)                                              |                     |            |

**Table C**

**Fig 3**

| Graph (panel) assay                                                   |    |                                                                       |  |                     |         |
|-----------------------------------------------------------------------|----|-----------------------------------------------------------------------|--|---------------------|---------|
| Control Genotype (n= discs analysed )<br>(Mean ± Std Error M)         | vs | Test Genotype (n)<br>(Mean ± Std Error M)                             |  | Test                | p Value |
| <b>Graph (E) Glial density</b>                                        |    |                                                                       |  |                     |         |
| <i>GMR-Gal4 tub-Gal80<sup>ts</sup>/+</i> (47)                         | vs | <i>repo&gt;rbf<sub>24hrs</sub> tub-Gal80<sup>ts</sup>/UAS-GFP</i> (8) |  | Mann-Whitney U-Test | <0.0001 |
| (0.0099±0.00034)                                                      |    | (0.001±0.00035)                                                       |  |                     |         |
| <i>GMR-QF/+; QUAS-rpr repo-Gal4/+</i> (24)                            | vs | <i>GMRQF&gt;rpr repo-Gal4&gt;rbf<sub>24hrs</sub></i> (11)             |  | Mann-Whitney U-Test | <0.0001 |
| (0.0178± 0.0004)                                                      |    | (0.0049± 0.001)                                                       |  |                     |         |
| <i>GMR-QF/+; QUAS-rpr repo-Gal4/+</i> (24)                            | vs | <i>GMRQF&gt;rpr repo-Gal4&gt;rbf<sub>72hrs</sub></i> (10)             |  | Mann-Whitney U-Test | <0.0001 |
| (0.0178± 0.0004)                                                      |    | (0.0027± 0.0002)                                                      |  |                     |         |
| <i>repo&gt;rbf<sub>24hrs</sub> tub-Gal80<sup>ts</sup>/UAS-GFP</i> (8) | vs | <i>GMRQF&gt;rpr repo-Gal4&gt;rbf<sub>24hrs</sub></i> (11)             |  | Mann-Whitney U-Test | 0.02    |
| (0.001±0.00035)                                                       |    | (0.0049± 0.001)                                                       |  |                     |         |

|                                                                                          |    |                                                                                  |                     |         |
|------------------------------------------------------------------------------------------|----|----------------------------------------------------------------------------------|---------------------|---------|
| <i>repo&gt;rbf<sub>24hrs</sub> tub-Gal80<sup>ts</sup>/UAS-GFP</i> (8)<br>(0.001±0.00035) | vs | <i>GMRQF&gt;rpr repo-Gal4&gt;rbf<sub>72hrs</sub></i> (10)<br>(0.0027±0.002)      | Mann-Whitney U-Test | 0.011   |
| <b>Graph (H) % PH3 glial cells</b>                                                       |    |                                                                                  |                     |         |
| <i>GMR-Gal4 tub-Gal80<sup>ts</sup>/+</i> (24)<br>(1.16±0.13)                             | vs | <i>repo&gt;rbf<sub>24hrs</sub> tub-Gal80<sup>ts</sup>/UAS-GFP</i> (8)<br>(0±0.0) | Mann-Whitney U-Test | <0.0001 |
| <i>GMR-QF/+; QUAS-rpr repo-Gal4/+</i> (13)<br>(2.3±0.23)                                 | vs | <i>GMRQF&gt;rpr repo-Gal4&gt;rbf<sub>24hrs</sub></i> (11)<br>(0.48±0.2)          | Mann-Whitney U-Test | 0.0004  |
| <i>GMR-QF/+; QUAS-rpr repo-Gal4/+</i> (13)<br>(2.3±0.23)                                 | vs | <i>GMRQF&gt;rpr repo-Gal4&gt;rbf<sub>72hrs</sub></i> (9)<br>(0±0.0)              | Mann-Whitney U-Test | <0.0001 |

**Table D**

**Fig 4**

| Graph (panel) assay<br>Control Genotype (n= discs analysed)<br>(Mean ± Std Error M)                  | vs | Test Genotype (n)<br>(Mean ± Std Error M)                                 | Test                | p Value |
|------------------------------------------------------------------------------------------------------|----|---------------------------------------------------------------------------|---------------------|---------|
| <b>Graph (Q) Ratio of Wrapping and PN glial cells</b>                                                |    |                                                                           |                     |         |
| n° wrapping glial cells / total glial<br><i>GMR-QF/+; UAS-GFP Mz97-Gal4/+</i> (22)<br>(0.3125±0.015) | vs | <i>GMR-QF/+; UAS-GFP Mz97-Gal4/+; QUAS-rpr/+</i> (17)<br>(0.149±0.006386) | Mann-Whitney U-Test | <0.0001 |
| n° Perineurial glial cells / total glial                                                             |    |                                                                           |                     |         |

|                                                                                                      |  |                     |         |
|------------------------------------------------------------------------------------------------------|--|---------------------|---------|
| <i>GMR-QF/+; UAS-GFP Mz97-Gal4/+</i> (22) vs <i>GMR-QF/+; UAS-GFP Mz97-Gal4/+; QUAS-rpr/+</i> (17)   |  | Mann-Whitney U-Test | <0.0001 |
| (0.68±0.016)                                                                                         |  | (0.85±0.006386)     |         |
| <b>Graph (R) Glial density</b>                                                                       |  |                     |         |
| n° wrapping glial cells / Area                                                                       |  |                     |         |
| <i>GMR-QF/+; UAS-GFP Mz97-Gal4/+</i> (21) vs <i>GMR-QF/+; UAS-GFP Mz97-Gal4/+; QUAS-rpr /+</i> (17)  |  | Mann-Whitney U-Test | <0.0001 |
| (0.004±0.00024)                                                                                      |  | (0.0026±9.7e-005)   |         |
| n° perineurial glial cells / Area                                                                    |  |                     |         |
| <i>GMR-QF/+; UAS-GFP Mz97-Gal4/+</i> (21) vs <i>GMR-QF/+; UAS-GFP Mz97-Gal4/+; QUAS-rpr /+</i> (17)  |  | Mann-Whitney U-Test | <0.0001 |
| (0.009±0.0004)                                                                                       |  | (0.015±90.00064)    |         |
| <b>Graph (S) Nuclei size</b>                                                                         |  |                     |         |
| Wrapping glial                                                                                       |  |                     |         |
| <i>GMR-QF/+; UAS-GFP Mz97-Gal4/+</i> (127) vs <i>GMR-QF/+; UAS-GFP Mz97-Gal4/+; QUAS-rpr /+</i> (93) |  | Mann-Whitney U-Test | <0.0001 |
| (41±0.69)                                                                                            |  | (49.9±1.3)          |         |
| Perineurial glial                                                                                    |  |                     |         |
| <i>GMR-QF/+; UAS-GFP Mz97-Gal4/+</i> (76) vs <i>GMR-QF/+; UAS-GFP Mz97-Gal4/+; QUAS-rpr /+</i> (50)  |  | Mann-Whitney U-Test | 0.0082  |
| (30±0.09)                                                                                            |  | (34.4±0.12)         |         |

**Table E****Fig 5**

| Graph (panel) assay                                                         |    |                                                                                       |  |                     |           |
|-----------------------------------------------------------------------------|----|---------------------------------------------------------------------------------------|--|---------------------|-----------|
| Control Genotype (n= discs analysed )<br>(Mean $\pm$ Std Error M)           | vs | Test Genotype (n)<br>(Mean $\pm$ Std Error M)                                         |  | Test                | p Value   |
| <b>Graph (I) % glia cells expressing pucZ2B</b>                             |    |                                                                                       |  |                     |           |
| Low levels                                                                  |    |                                                                                       |  |                     |           |
| <i>GMR-Gal4 tub-Gal80<sup>ts</sup>/+; pucZ2B</i> (13)<br>(17.39 $\pm$ 1.03) | vs | <i>UAS-rpr/+ GMR-Gal4 tub-Gal80<sup>ts</sup>/+ ;pucZ2B</i> (11)<br>(17.26 $\pm$ 1.5)  |  | Mann-Whitney U-Test | ns (0.94) |
| <b>Graph (J) % glia cells expressing pucZ2B (High)</b>                      |    |                                                                                       |  |                     |           |
| High levels                                                                 |    |                                                                                       |  |                     |           |
| <i>GMR-Gal4 tub-Gal80<sup>ts</sup>/+; pucZ2B</i> (11)<br>(30.13 $\pm$ 4.5)  | vs | <i>UAS-rpr/+ GMR-Gal4 tub-Gal80<sup>ts</sup>/+; pucZ2B</i> (11)<br>( 43.91 $\pm$ 3.8) |  | Mann-Whitney U-Test | 0.02      |

**Table F****Fig 6**

| Graph (panel) assay                                                    |    |                                                                                              |  |               |           |
|------------------------------------------------------------------------|----|----------------------------------------------------------------------------------------------|--|---------------|-----------|
| Control Genotype (n= discs analysed )<br>(Mean $\pm$ Std Error M)      | vs | Test Genotype (n)<br>(Mean $\pm$ Std Error M)                                                |  | Test          | p Value   |
| <b>Graph (H) n° glial cells / Area</b>                                 |    |                                                                                              |  |               |           |
| <i>GMR-Gal4 tub-Gal80<sup>ts</sup>/+ (47)</i><br>(0.0099 $\pm$ 0.0003) | vs | <i>UAS-bsk<sup>DN</sup>/+ ;GMR-Gal4 tub-Gal80<sup>ts</sup>/+ (13)</i><br>(0.009 $\pm$ 00068) |  | One-Way ANOVA | ns (0.95) |

|                                                                             |    |                                                                                                            |                     |            |
|-----------------------------------------------------------------------------|----|------------------------------------------------------------------------------------------------------------|---------------------|------------|
| <i>UAS-rpr/+ GMR-Gal4 tub-Gal80<sup>ts</sup>/+ (39)</i><br>(0.019± 0.00045) | vs | <i>UAS-rpr/UAS-bsk<sup>DN</sup> GMR-Gal4 tub-Gal80<sup>ts</sup> (20)</i><br>(0.015± 0.0006)                | One-Way ANOVA       | <0.0001    |
| <i>UAS-rpr/+ GMR-Gal4 tub-Gal80<sup>ts</sup>/+ (39)</i><br>(0.019± 0.00045) | vs | <i>UAS-rpr/+ GMR-Gal4 tub-Gal80<sup>ts</sup>/+; UAS eiger<sup>RNAi</sup> (10)</i><br>(0.0177± 0.0016)      | One-Way ANOVA       | ns( 0.68)  |
| <i>GMR-QF/+; QUAS-rpr repo-Gal4/+ (24)</i><br>(0.0178± 0.0004)              | vs | <i>GMR-QF/+; eiger<sup>1</sup>/eiger<sup>3</sup>; QUAS-rpr repo-Gal4/+ (12)</i><br>(0.0173± 0.0007)        | One-Way ANOVA       | ns (0.99)  |
| <b>Graph (I) % PH3 glial cells</b>                                          |    |                                                                                                            |                     |            |
| <i>UAS-rpr/+; GMR-Gal4 tub-Gal80<sup>ts</sup>/+ (35)</i><br>(1.75±0.11)     | vs | <i>UAS-bsk<sup>DN</sup>/UAS-rpr ; GMR-Gal4 tub-Gal80<sup>ts</sup> /+ (10)</i><br>(1.49±0.37)               | One-Way ANOVA       | ns (0. 89) |
| <i>GMR-QF/+; QUAS-rpr repo-Gal4/+ (13)</i><br>(2.3± 0.23)                   | vs | <i>GMR-QF/+; eiger<sup>1</sup>/eiger<sup>3</sup>; QUAS-rpr repo-Gal4/+ (13)</i><br>(1.7± 0.24)             | One-Way ANOVA       | ns (0.33)  |
| <b>Graph (N) Glial density</b>                                              |    |                                                                                                            |                     |            |
| <i>repo-Gal4 tub-Gal80<sup>ts</sup> /+ (23)</i><br>(0.0094±0.0003)          | vs | <i>UAS-bsk<sup>DN</sup>/+ ;repo-Gal4 tub-Gal80<sup>ts</sup> /+ (17)</i><br>(0.0063±0.0004)                 | Mann-Whitney U-Test | <0.0001    |
| <i>GMR-QF/+; QUAS-rpr repo-Gal4/+ (24)</i><br>(0.0178± 0.0004)              | vs | <i>GMR-QF/UAS-bsk<sup>DN</sup>; tub-Gal80<sup>ts</sup>/+; QUAS-rpr repo-Gal4/+ (21)</i><br>(0.015± 0.0004) | Mann-Whitney U-Test | <0.0001    |
| <b>Graph (O) (% PH3 glial cells)</b>                                        |    |                                                                                                            |                     |            |
| <i>repo-Gal4 tub-Gal80<sup>ts</sup>/+ (23)</i><br>(1.64 ±0.11)              | vs | <i>UAS-bsk<sup>DN</sup>/+; repo-Gal4 tub-Gal80<sup>ts</sup> /+ (9)</i><br>(1.35±0.46)                      | Mann-Whitney U-Test | ns (0.09)  |
| <i>GMR-QF/+; QUAS-rpr repo-Gal4/+ (13)</i><br>(2.3± 0.23)                   | vs | <i>GMR-QF/UAS-bsk<sup>DN</sup>; tub-Gal80<sup>ts</sup>/+; QUAS-rpr repo-Gal4/+ (17)</i><br>(2.24±0.23)     | Mann-Whitney U-Test | ns(0.57)   |

**Table G**

**Fig 8**

| Graph (panel) assay<br>Control Genotype (n= discs analysed )<br>(Mean $\pm$ Std Error M) | vs | Test Genotype (n)<br>(Mean $\pm$ Std Error M)                                          | Test          | p Value   |
|------------------------------------------------------------------------------------------|----|----------------------------------------------------------------------------------------|---------------|-----------|
| <b>Graph (G) Glial density</b>                                                           |    |                                                                                        |               |           |
| <i>UAS-rpr/+; GMR-Gal4 tub-Gal80<sup>ts</sup>/+</i> (39)<br>(0.019 $\pm$ 0.00045)        | vs | <i>GMR&gt;rpr dpp<sup>RNAi33</sup> hh<sup>RNAi</sup></i> (18)<br>(0.015 $\pm$ 0.00039) | One-Way ANOVA | <0.0001   |
| <i>GMR&gt;rpr 2UAS</i> (15)<br>(0.018 $\pm$ 0.00096)                                     | vs | <i>GMR&gt;rpr dpp<sup>RNAi33</sup> hh<sup>RNAi</sup></i> (18)<br>(0.015 $\pm$ 0.00039) | One-Way ANOVA | 0.0059    |
| <i>UAS-rpr/+; GMR-Gal4 tub-Gal80<sup>ts</sup>/+</i> (39)<br>(0.019 $\pm$ 0.00045)        | vs | <i>GMR&gt;rpr dpp<sup>RNAi33</sup></i> (13)<br>(0.0185 $\pm$ 0.001)                    | One-Way ANOVA | ns (0.94) |
| <i>UAS-rpr/+; GMR-Gal4 tub-Gal80<sup>ts</sup>/+</i> (39)<br>(0.019 $\pm$ 0.00045)        | vs | <i>UAS-rpr/+; GMR&gt;rpr hh<sup>RNAi</sup></i> (10)<br>(0.019 $\pm$ 0.00088)           | One-Way ANOVA | ns (0.99) |
| <i>GMR-Gal4 tub-Gal80<sup>ts</sup>/+</i> (47)<br>(0.0099 $\pm$ 0.00034)                  | vs | <i>GMR&gt; dpp<sup>RNAi33</sup> hh<sup>RNAi</sup></i> (12)<br>(0.0089 $\pm$ 0.00044)   | One-Way ANOVA | ns (0.53) |
| <i>GMR-Gal4 tub-Gal80<sup>ts</sup>/+</i> (47)<br>(0.0099 $\pm$ 0.00034)                  | vs | <i>GMR&gt; dpp<sup>RNAi33</sup></i> (12)<br>(0.0088 $\pm$ 0.00035)                     | One-Way ANOVA | ns (0.39) |
| <i>GMR-Gal4 tub-Gal80<sup>ts</sup>/+</i> (47)<br>(0.0099 $\pm$ 0.00034)                  | vs | <i>GMR&gt; hh<sup>RNAi</sup></i> (8)<br>(0.0095 $\pm$ 0.00086)                         | One-Way ANOVA | ns (0.95) |



| <b>Graph (H) % PH3 glial cells</b>                             |    |                                                               |               |           |
|----------------------------------------------------------------|----|---------------------------------------------------------------|---------------|-----------|
| <i>UAS-rpr/+; GMR-Gal4 tub-Gal80<sup>ts</sup>/UAS-GFP</i> (34) | vs | <i>GMR&gt;rpr dpp<sup>RNAi33</sup> hh<sup>RNAi</sup></i> (16) | One-Way ANOVA | 0.01      |
| (1.8 <sub>±</sub> 0.1)                                         |    | (1.23 <sub>±</sub> 0.12)                                      |               |           |
| <i>UAS-rpr/+; GMR-Gal4 tub-Gal80<sup>ts</sup>/UAS-GFP</i> (34) | vs | <i>GMR&gt;rpr dpp<sup>RNAi33</sup></i> (12)                   | One-Way ANOVA | ns (0.45) |
| (1.8 <sub>±</sub> 0.1)                                         |    | (1.53 <sub>±</sub> 0.18)                                      |               |           |
| <i>UAS-rpr/+; GMR-Gal4 tub-Gal80<sup>ts</sup>/UAS-GFP</i> (34) | vs | <i>UAS-rpr/+; GMR&gt;rpr hh<sup>RNAi</sup></i> (10)           | One-Way ANOVA | ns (0.73) |
| (1.8 <sub>±</sub> 0.1)                                         |    | (0.16 <sub>±</sub> 0.2)                                       |               |           |
| <i>GMR-Gal4 tub-Gal80<sup>ts</sup>/UAS-GFP</i> (23)            | vs | <i>GMR&gt;dpp<sup>RNAi33</sup> hh<sup>RNAi</sup></i> (14)     | One-Way ANOVA | ns (0.99) |
| (1.21 <sub>±</sub> 0.13)                                       |    | (1.23 <sub>±</sub> 0.22)                                      |               |           |
| <i>GMR-Gal4 tub-Gal80<sup>ts</sup>/UAS-GFP</i> (23)            | vs | <i>GMR&gt;dpp<sup>RNAi33</sup></i> (14)                       | One-Way ANOVA | ns (0.32) |
| (1.21 <sub>±</sub> 0.13)                                       |    | (0.88 <sub>±</sub> 0.11)                                      |               |           |
| <i>GMR-Gal4 tub-Gal80<sup>ts</sup>/UAS-GFP</i> (23)            | vs | <i>GMR&gt;hh<sup>RNAi</sup></i> (8)                           | One-Way ANOVA | ns (0.28) |
| (1.2 <sub>±</sub> 0.13)                                        |    | (0.79 <sub>±</sub> 0.15)                                      |               |           |
| <b>Graph (O) Glial density</b>                                 |    |                                                               |               |           |
| <i>GMR-QF/+; QUAS-rpr repo-Gal4/+</i> (27)                     | vs | <i>GMR-QF&gt;rpr; repo&gt;patch</i> (9)                       | One-Way ANOVA | ns (0.98) |
| (0.018 <sub>±</sub> 0.0004)                                    |    | (0.0176 <sub>±</sub> 0.001)                                   |               |           |
| <i>GMR-QF/+; QUAS-rpr repo-Gal4/+</i> (27)                     | vs | <i>GMR-QF&gt;rpr; repo&gt;brk</i> (20)                        | One-Way ANOVA | <0.0001   |
| (0.018 <sub>±</sub> 0.0004)                                    |    | (0.0067 <sub>±</sub> 0.007)                                   |               |           |
| <i>GMR-QF/+; QUAS-rpr repo-Gal4/+</i> (27)                     | vs | <i>GMR-QF&gt;rpr; repo&gt;patched brk</i> (12)                | One-Way ANOVA | <0.0001   |
| (0.018 <sub>±</sub> 0.0004)                                    |    | (0.004 <sub>±</sub> 0.0007)                                   |               |           |
| <i>GMR-QF&gt;rpr repo&gt;UAS-brk</i> (20)                      | vs | <i>GMR-QF&gt;rpr; repo&gt;patched brk</i> (12)                | One-Way ANOVA | 0.047     |

|                                                |                |  |                                                |               |           |
|------------------------------------------------|----------------|--|------------------------------------------------|---------------|-----------|
|                                                | (0.0067±0.007) |  | (0.004±0.0007)                                 |               |           |
| <i>tub-Gal80<sup>ts</sup> repo-Gal4/+</i> (23) | vs             |  | <i>repo&gt;patch</i> (23)                      | One-Way ANOVA | 0.0011    |
| (0.0094±0.0003)                                |                |  | (0.0069±0.0002)                                |               |           |
| <i>tub-Gal80<sup>ts</sup> repo-Gal4/+</i> (23) | vs             |  | <i>repo&gt;brk</i> (21)                        | One-Way ANOVA | <0.0001   |
| (0.0094±0.0003)                                |                |  | (0.0036±0.00026)                               |               |           |
| <i>repo&gt;brk</i> (21)                        | vs             |  | <i>repo&gt;patch brk</i> (22)                  | One-Way ANOVA | ns (0.4)  |
| (0.0036±0.00026)                               |                |  | (0.003±0.00011)                                |               |           |
| <b>Graph (P) % PH3 glial cells</b>             |                |  |                                                |               |           |
| <i>GMR-QF/+; QUAS-rpr repo-Gal4/+</i> (13) vs  |                |  | <i>GMR-QF&gt;rpr; repo&gt;patched</i> (9)      | One-Way ANOVA | ns (0.98) |
| (2.3±0.23)                                     |                |  | (2.16±0.26)                                    |               |           |
| <i>GMR-QF/+; QUAS-rpr repo-Gal4/+</i> (13) vs  |                |  | <i>GMR-QF&gt;rpr repo&gt;brk</i> (12)          | One-Way ANOVA | <0.0001   |
| (2.3±0.23)                                     |                |  | (0.58±0.25)                                    |               |           |
| <i>GMR-QF/+; QUAS-rpr repo-Gal4/+</i> (13) vs  |                |  | <i>GMR-QF&gt;rpr; repo&gt;patched brk</i> (12) | One-Way ANOVA | <0.0001   |
| (2.3±0.23)                                     |                |  | (0.54±0.28)                                    |               |           |
| <i>GMR-QF&gt;rpr; repo&gt;UAS-brk</i> (12)     | vs             |  | <i>GMR-QF&gt;rpr; repo&gt;patched brk</i> (12) | One-Way ANOVA | ns( 0.99) |
| (0.58±0.25)                                    |                |  | (0.54±0.28)                                    |               |           |
| <i>tub-Gal80<sup>ts</sup> repo-Gal4/+</i> (23) | vs             |  | <i>repo&gt;patch</i> (12)                      | One-Way ANOVA | ns(0.87)  |
| (1.64±0.11)                                    |                |  | (1.42±0.22)                                    |               |           |
| <i>tub-Gal80<sup>ts</sup> repo-Gal4/+</i> (23) | vs             |  | <i>repo&gt;brk</i> (10)                        | One-Way ANOVA | 0.003     |
| (1.64±0.11)                                    |                |  | (0.52±0.22)                                    |               |           |
| <i>tub-Gal80<sup>ts</sup> repo-Gal4/+</i> (23) | vs             |  | <i>repo&gt;patch brk</i> (13)                  | One-Way ANOVA | 0.018     |
| (1.64±0.11)                                    |                |  | (0.79±0.33)                                    |               |           |

**Table H**

**Fig 9**

| Graph (panel) assay<br>Control Genotype (n= discs analysed )<br>(Mean $\pm$ Std Error M) | vs | Test Genotype (n)<br>(Mean $\pm$ Std Error M) | Test | p Value |
|------------------------------------------------------------------------------------------|----|-----------------------------------------------|------|---------|
|------------------------------------------------------------------------------------------|----|-----------------------------------------------|------|---------|

|                                                                                              |    |                                                                                     |               |           |
|----------------------------------------------------------------------------------------------|----|-------------------------------------------------------------------------------------|---------------|-----------|
| <b>Graph (G) Glial density</b><br><i>Control repo&gt;Gal4</i> (23)<br>(0.0094 $\pm$ 0.00037) | vs | <i>repo&gt;ihog</i> (17)<br>(0.01 $\pm$ 0.0005)                                     | One-Way ANOVA | ns (0.89) |
| <i>Control repo&gt;Gal4</i> (23)<br>(0.0094 $\pm$ 0.00037)                                   | vs | <i>repo&gt;ci<sup>m1-3</sup></i> (11)<br>(0.006 $\pm$ 0.0003)                       | One-Way ANOVA | ns (0.15) |
| <i>Control repo&gt;Gal4</i> (23)<br>(0.0094 $\pm$ 0.00037)                                   | vs | <i>repo&gt;tkv<sup>QD</sup></i> (18)<br>(0.012 $\pm$ 0.0004)                        | One-Way ANOVA | 0.04      |
| <i>Control repo&gt;Gal4</i> (23)<br>(0.0094 $\pm$ 0.00037)                                   | vs | <i>repo&gt;ihog tkv<sup>QD</sup></i> (22)<br>(0.019 $\pm$ 0.001)                    | One-Way ANOVA | <0.0001   |
| <i>Control repo&gt;Gal4</i> (23)<br>(0.0094 $\pm$ 0.00037)                                   | vs | <i>repo&gt;tkv<sup>QD</sup> ci<sup>m1-3</sup></i> (11)<br>(0.012 $\pm$ 0.0005)      | One-Way ANOVA | 0.037     |
| <i>Control repo&gt;Gal4</i> (23)<br>(0.0094 $\pm$ 0.00037)                                   | vs | <i>hep<sup>R75</sup> repo&gt;ihog tkv<sup>QD</sup></i> (13)<br>(0.012 $\pm$ 0.0009) | One-Way ANOVA | 0.02      |
| <i>repo&gt;ihog tkv<sup>QD</sup></i> (22)<br>(0.019 $\pm$ 0.001)                             | vs | <i>repo&gt;tkv<sup>QD</sup></i> (18)<br>(0.012 $\pm$ 0.0004)                        | One-Way ANOVA | <0.0001   |
| <i>repo&gt;ihog tkv<sup>QD</sup></i> (22)<br>(0.019 $\pm$ 0.001)                             | vs | <i>hep<sup>R75</sup> repo&gt;tkv<sup>QD</sup> ihog</i> (13)<br>(0.012 $\pm$ 0.0009) | One-Way ANOVA | <0.0001   |

**Graph (H) % PH3 glia**

|                                                          |    |                                                                            |               |            |
|----------------------------------------------------------|----|----------------------------------------------------------------------------|---------------|------------|
| Control <i>repo&gt;Gal4</i> (23)<br>(1.64±0.11)          | vs | <i>repo&gt;ihog</i> (11)<br>(1.19±0.17)                                    | One-Way ANOVA | ns (0.28)  |
| Control <i>repo&gt;Gal4</i> (22)<br>(1.64±0.11)          | vs | <i>repo&gt;ci<sup>m1-3</sup></i> (10)<br>(1.55±0.17)                       | One-Way ANOVA | ns (0.9)   |
| Control <i>repo&gt;Gal4</i> (22)<br>(1.64±0.11)          | vs | <i>repo&gt;tkv<sup>QD</sup></i> (16)<br>(1.52±0.15)                        | One-Way ANOVA | ns (0.9)   |
| Control <i>repo&gt;Gal4</i> (22)<br>(1.64±0.11)          | vs | <i>repo&gt;tkv<sup>QD</sup> ci<sup>m1-3</sup></i> (12)<br>(2.20±0.1)       | One-Way ANOVA | ns (0.069) |
| Control <i>repo&gt;Gal4</i> (22)<br>(1.64±0.11)          | vs | <i>repo&gt;ihog tkv<sup>QD</sup></i> (11)<br>(2.39±0.16)                   | One-Way ANOVA | 0.005      |
| Control <i>repo&gt;Gal4</i> (22)<br>(1.64±0.11)          | vs | <i>hep<sup>R75</sup> repo&gt;tkv<sup>QD</sup> ihog</i> (14)<br>(2.35±0.13) | One-Way ANOVA | 0.004      |
| <i>repo&gt;tkv<sup>QD</sup></i> (16)<br>(1.52±0.15)      | vs | <i>repo&gt;ihog tkv<sup>QD</sup></i> (11)<br>(2.39±0.16)                   | One-Way ANOVA | <0.0001    |
| <i>repo&gt;ihog tkv<sup>QD</sup></i> (11)<br>(2.39±0.16) | vs | <i>hep<sup>R75</sup> repo&gt;tkv<sup>QD</sup> ihog</i> (14)<br>(2.35±0.13) | One-Way ANOVA | ns (0.9)   |

**Graph (I) Overmigration**

Overmigration wt n=20 rpr n=20 *repo tkv<sup>QD</sup>*=22 *repo tkv<sup>QD</sup> ihog*=18 *repo ihog*=23 *hep<sup>R75</sup> repo tkvqd ihog* =20

**Table I****Fig 10**

| Graph (panel) assay<br>Control Genotype (n= discs analysed )<br>(Mean $\pm$ Std Error M) | vs | Test Genotype (n)<br>(Mean $\pm$ Std Error M)                            | Test          | p Value   |
|------------------------------------------------------------------------------------------|----|--------------------------------------------------------------------------|---------------|-----------|
| <b>Graph (K) WG Glial density</b>                                                        |    |                                                                          |               |           |
| <i>Mz97-Gal4 UAS-GFP</i> (21) (control)<br>(0.004 $\pm$ 0.00024)                         | vs | <i>GMR&gt;rpr Mz97-GFP</i> (17)<br>(0.0026 $\pm$ 9,733e-005)             | One-Way ANOVA | <0.0001   |
| <i>Mz97-Gal4 UAS-GFP</i> (21)<br>(0.004 $\pm$ 0.00024)                                   | vs | <i>Mz97-puc</i> (10)<br>(0.0044 $\pm$ 0.00034)                           | One-Way ANOVA | ns (0.9)  |
| <i>Mz97-Gal4 UAS-GFP</i> (21)<br>(0.004 $\pm$ 0.00024)                                   | vs | <i>Mz97-bsk<sup>DN</sup></i> (10)<br>(0.0029 $\pm$ 0.00012)              | One-Way ANOVA | 0.037     |
| <i>Mz97-Gal4 UAS-GFP</i> (21)<br>(0.004 $\pm$ 0.00024)                                   | vs | <i>hep<sup>R75</sup> Mz97-GFP</i> (12)<br>(0.0028 $\pm$ 0.00027)         | One-Way ANOVA | 0.0067    |
| <i>GMR&gt;rpr Mz97-GFP</i> (17)<br>(0.0026 $\pm$ 9,733e-005)                             | vs | <i>GMR&gt;rpr Mz97&gt;puc</i> (17)<br>(0.003 $\pm$ 0.00023)              | One-Way ANOV  | ns (0.88) |
| <i>GMR&gt;rpr Mz97-GFP</i> (17)<br>(0.0026 $\pm$ 9,733e-005)                             | vs | <i>GMR&gt;rpr Mz97&gt;bsk<sup>DN</sup></i> (7)<br>(0.0026 $\pm$ 0.00019) | One-Way ANOVA | ns (0.99) |

| <b>Graph (L) WG/Total glia</b>                          |    |                                                                 |               |            |
|---------------------------------------------------------|----|-----------------------------------------------------------------|---------------|------------|
| <i>Mz97-Gal4 UAS-GFP</i> (22) (control)<br>(0.31±0.015) | vs | <i>GMR&gt;rpr Mz97-GFP</i> (17)<br>(0.149±0.0063)               | One-Way ANOVA | <0.0001    |
| <i>Mz97-Gal4 UAS-GFP</i> (22)<br>(0.31±0.015)           | vs | <i>Mz97-puc</i> (10)<br>(0.35±0.022)                            | One-Way ANOVA | ns (0.34)  |
| <i>Mz97-Gal4 UAS-GFP</i> (22)<br>(0.31±0.015)           | vs | <i>Mz97-bsk<sup>DN</sup></i> (10)<br>(0.27±0.009)               | One-Way ANOVA | ns (0.56)  |
| <i>Mz97-Gal4 UAS-GFP</i> (22)<br>(0.31±0.015)           | vs | <i>hep<sup>R75</sup> Mz97-GFP</i> (12)<br>(0.25±0.019)          | One-Way ANOVA | ns (0.068) |
| <i>GMR&gt;rpr Mz97-GFP</i> (17)<br>(0.149±0.0063)       | vs | <i>GMR&gt;rpr Mz97&gt;puc</i> (17)<br>(0.11±0.01)               | One-Way ANOVA | 0.0083     |
| <i>GMR&gt;rpr Mz97-GFP</i> (17)<br>(0.149±0.0063)       | vs | <i>GMR&gt;rpr Mz97&gt;bsk<sup>DN</sup></i> (7)<br>(0.08±0.0052) | One-Way ANOVA | 0.0001     |
| <b>Graph (M) Nuclei size</b>                            |    |                                                                 |               |            |
| <i>Mz97-Gal4 UAS-GFP</i> (127) (control)<br>(41±0.69)   | vs | <i>GMR&gt;rpr Mz97-GFP</i> (93)<br>(49.9±1.28)                  | One-Way ANOVA | <0.0001    |
| <i>Mz97-Gal4 UAS-GFP</i> (127)<br>(41±0.69)             | vs | <i>Mz97-puc</i> (91)<br>(45.2±0.84)                             | One-Way ANOVA | 0.008      |
| <i>Mz97-Gal4 UAS-GFP</i> (127)<br>(41±0.69)             | vs | <i>Mz97-bsk<sup>DN</sup></i> (102)<br>(49.9±1.03)               | One-Way ANOVA | <0.0001    |

|                                                |    |                                                                |               |         |
|------------------------------------------------|----|----------------------------------------------------------------|---------------|---------|
| <i>GMR&gt;rpr Mz97-GFP</i> (93)<br>(49.9±1.28) | vs | <i>GMR&gt;rpr Mz97&gt;puc</i> (86)<br>(41.3±0.92)              | One-Way ANOVA | <0.0001 |
| <i>GMR&gt;rpr Mz97-GFP</i> (93)<br>(49.9±1.28) | vs | <i>GMR&gt;rpr Mz97&gt;bsk<sup>DN</sup></i> (44)<br>(39.5±1.56) | One-Way ANOVA | <0.0001 |

**Table J**

**Fig 11**

| Graph (panel) assay<br>Control Genotype (n= discs analysed)<br>(Mean ± Std Error M)                  | vs | Test Genotype (n)<br>(Mean ± Std Error M)                                     | Test          | p Value   |
|------------------------------------------------------------------------------------------------------|----|-------------------------------------------------------------------------------|---------------|-----------|
| <b>Graph (C) NO. glial cells</b><br><i>Dll-Gal4 tub-Gal80<sup>ts</sup></i> (60)<br>(102.2±4.07)      | vs | <i>UAS-rpr; hh-Gal4 tub-Gal80<sup>ts</sup></i> (24)<br>(161.5±8.03)           | One-way ANOVA | <0.0001   |
| <i>Dll-Gal4 tub-Gal80<sup>ts</sup></i> (60)<br>(102.2±4.07)                                          | vs | <i>UAS-rpr; Dll-Gal4 tub-Gal80<sup>ts</sup></i> (15)<br>(153.1±11.67)         | One-way ANOVA | <0.0001   |
| <i>Dll-Gal4 tub-Gal80<sup>ts</sup></i> (60)<br>(102.2±4.07)                                          | vs | <i>UAS-rpr; Dll-Gal4 tub-Gal80<sup>ts</sup>; UAS-GFP</i> (25)<br>(146.2±5.94) | One-way ANOVA | <0.0001   |
| <b>Graph (D) % PH3 glial cells</b><br><i>Dll-Gal4 tub-Gal80<sup>ts</sup></i> (17)<br>(0.4767±0.1313) | vs | <i>UAS-rpr; hh-Gal4 tub-Gal80<sup>ts</sup></i> (15)<br>(0.2458±0.0828)        | One-way ANOVA | ns (0.39) |

*Dll-Gal4 tub-Gal80<sup>ts</sup>* (17)  
(0.4767±0.1313)

vs

*UAS-rpr, Dll-Gal4 tub-Gal80<sup>ts</sup>* (15)  
(0.732±0.1514)

One-way ANOVA

ns (0.32)
