# Supplementary material for: Dpp and Hedgehog promote the glial response to neuronal apoptosis in the developing Drosophila visual system
Source: PubMed Central journal article supplement (PMC8396793; doi:10.1371/journal.pbio.3001367), 2021-08-11
Supplement: pbio.3001367.s028.pdf [file pbio.3001367.s028.pdf]

## Statistical Tables supplementary Figures

### Table A

S2 Fig

| Graph (panel) assay<br>Control Genotype (n= discs analysed)<br>(Mean $\pm$ Std Error M)                    | vs | Test Genotype (n)<br>(Mean $\pm$ Std Error M)                                       | Test                | p Value |
|------------------------------------------------------------------------------------------------------------|----|-------------------------------------------------------------------------------------|---------------------|---------|
| <b>Graph (E) % glial cells EdU+</b><br><i>GMR-Gal4 tub-Gal80<sup>ts</sup>/+</i> (10)<br>(29.02 $\pm$ 0.98) | vs | <i>UAS-rpr/+ ;GMR-Gal4 tub-Gal80<sup>ts</sup>/UAS-GFP</i> (10)<br>(34.83 $\pm$ 1.7) | Mann-Whitney U-Test | 0.0083  |
| <b>Graph (F) % PH3 glial cells</b><br><i>GMR-Gal4 tub-Gal80<sup>ts</sup>/+</i> (24)<br>(1.16 $\pm$ 0.13)   | vs | <i>UAS-rpr/+ ; GMR-Gal4 tub-Gal80<sup>ts</sup> UAS-GFP</i> (35)<br>(1.79 $\pm$ 0.1) | Mann-Whitney U-Test | 0.0011  |

### Table B

S3 Fig

| Graph (panel) assay<br>Control Genotype (n= discs analysed)<br>(Mean $\pm$ Std Error M)                          | vs | Test Genotype (n)<br>(Mean $\pm$ Std Error M)                                         | Test          | p Value |
|------------------------------------------------------------------------------------------------------------------|----|---------------------------------------------------------------------------------------|---------------|---------|
| <b>Graph (E) Glia proliferation</b><br><i>GMR-Gal4 tub-Gal80<sup>ts</sup>/+</i> (20)<br>(0.00025 $\pm$ 2.4e-005) | vs | T0 <i>UAS-rpr/+ GMR-Gal4, tub-Gal80<sup>ts</sup></i> (14)<br>(0.00047 $\pm$ 4.7e-005) | One-way ANOVA | <0.0001 |

|                                                                     |    |                                                                                 |               |           |
|---------------------------------------------------------------------|----|---------------------------------------------------------------------------------|---------------|-----------|
| <i>GMR-Gal4 tub-Gal80<sup>ts</sup>/+</i> (20)<br>(0.00025±2.4e-005) | vs | T1 <i>UAS-rpr/+ GMR-Gal4 tub-Gal80<sup>ts</sup></i> (10)<br>(0.00044±2.08e-005) | One-way ANOVA | 0.0018    |
| <i>GMR-Gal4 tub-Gal80<sup>ts</sup>/+</i> (20)<br>(0.00025±2.4e-005) | vs | T2 <i>UAS-rpr/+ GMR-Gal4 tub-Gal80<sup>ts</sup></i> (10)<br>(0.00015±2.99e-005) | One-way ANOVA | ns (0.12) |

## Table C

### S4 Fig

| Graph (panel) assay<br>Control Genotype (n= discs analysed)<br>(Mean ± Std Error M)                    | vs | Test Genotype (n)<br>(Mean ± Std Error M)                          | Test                | p Value |
|--------------------------------------------------------------------------------------------------------|----|--------------------------------------------------------------------|---------------------|---------|
| <b>Graph (E) Glial cells migration WG</b><br><i>GMR-QF/+; UAS-GFP Mz97-Gal4/+</i> (18)<br>(-0,44±0.18) | vs | <i>GMR-QF/+; UAS-GFP Mz97-Gal4/+; QUAS-rpr /+</i> (16)<br>(-5±0.2) | Mann-Whitney U-Test | <0.0001 |

**Table D**

**S10 Fig**

| Graph (panel) assay<br>Control Genotype (n= discs analysed)<br>(Mean $\pm$ Std Error M) | vs | Test Genotype (n)<br>(Mean $\pm$ Std Error M)                           | Test                | p Value    |
|-----------------------------------------------------------------------------------------|----|-------------------------------------------------------------------------|---------------------|------------|
| <b>Graph (D) n° glial cells / Area</b>                                                  |    |                                                                         |                     |            |
| <i>GMR-Gal4 tub-Gal80<sup>ts</sup>/+</i> (47)<br>(0.0099 $\pm$ 0.0003)                  | vs | <i>hep<sup>R75</sup></i> (32)<br>(0.0058 $\pm$ 0.00026)                 | One-Way ANOVA       | <0.0001    |
| <i>GMR-Gal4 tub-Gal80<sup>ts</sup>/+</i> (47)<br>(0.0099 $\pm$ 0.0003)                  | vs | <i>eiger<sup>1</sup>/eiger<sup>3</sup></i> (17)<br>(0.009 $\pm$ 0.0006) | One-Way ANOVA       | ns (0.35)  |
| <b>Graph (E) % PH3 glial cells</b>                                                      |    |                                                                         |                     |            |
| <i>GMR-Gal4 tub-Gal80<sup>ts</sup>/+</i> (24)<br>(1.16 $\pm$ 0.13)                      | vs | <i>hep<sup>R75</sup></i> (12)<br>(1.62 $\pm$ 0.38)                      | One-Way ANOVA       | ns (0.31)  |
| <i>GMR-Gal4 tub-Gal80<sup>ts</sup>/+</i> (24)<br>(1.16 $\pm$ 0.13)                      | vs | <i>eiger<sup>1</sup>/eiger<sup>3</sup></i> (11)<br>(1.89 $\pm$ 0.18)    | One-Way ANOVA       | ns (0.069) |
| <b>Graph (F) % glial cells EdU+</b>                                                     |    |                                                                         |                     |            |
| <i>GMR-Gal4 tub-Gal80<sup>ts</sup>/+</i> (10)<br>(29 $\pm$ 0.98)                        | vs | <i>hep<sup>R75</sup></i> (9)<br>(27.08 $\pm$ 1.38)                      | Mann-Whitney U-Test | ns (0.48)  |

**Table E**

**S13 Fig**

| Graph (panel) assay<br>Control Genotype (n= discs analysed)<br>(Mean $\pm$ Std Error M)                           | vs | Test Genotype (n)<br>(Mean $\pm$ Std Error M)                                                                    | Test                | p Value   |
|-------------------------------------------------------------------------------------------------------------------|----|------------------------------------------------------------------------------------------------------------------|---------------------|-----------|
| <b>Graph (I) n° glial cells / Area</b><br><i>GMR-Gal4 tub-Gal80<sup>ts/+</sup></i> (47)<br>(0.0099 $\pm$ 0.00034) | vs | <i>GMR-Gal4 tub-Gal80<sup>ts</sup> UAS-hep<sup>CA</sup></i> (15)<br>(0.011 $\pm$ 0.00043)                        | One-Way ANOVA       | 0.0329    |
| <i>GMR-Gal4 tub-Gal80<sup>ts/+</sup></i> (47)<br>(0.0099 $\pm$ 0.00034)                                           | vs | <i>GMR-Gal4 tub-Gal80<sup>ts</sup> UAS-hep<sup>CA</sup> UAS micro<sup>RGH</sup></i> (10)<br>(0.01 $\pm$ 0.00045) | One-Way ANOVA       | ns(0.9)   |
| <i>UAS-rpr/+ GMR-Gal4, tub-Gal80<sup>ts/+</sup></i> (39)<br>(0.019 $\pm$ 0.00043)                                 | vs | <i>GMR-Gal4 tub-Gal80<sup>ts</sup> UAS-hep<sup>CA</sup> UAS micro<sup>RGH</sup></i> (10)<br>(0.01 $\pm$ 0.00045) | One-Way ANOVA       | <0.0001   |
| <b>Graph (J) n° glial cells / Area</b><br><i>GMR-Gal4 tub-Gal80<sup>ts/+</sup></i> (47)<br>(0.0099 $\pm$ 0.00034) | vs | <i>repo-Gal4 tub-Gal80<sup>ts</sup> UAS-hep<sup>CA</sup></i> (13)<br>(0.01 $\pm$ 0.00059)                        | Mann-Whitney U-Test | ns (0.57) |
| <b>Graph (K) Glial migration</b><br><i>GMR-Gal4 tub-Gal80<sup>ts/+</sup></i> (27)<br>(-3.44 $\pm$ 0.32)           | vs | <i>repo-Gal4 tub-Gal80<sup>ts</sup> UAS-hep<sup>CA</sup></i> (13)<br>(-2.76 $\pm$ 0.36)                          | Mann-Whitney U-Test | ns (0.15) |

**Table F**

**S17 Fig**

| Graph (panel) assay<br>Control Genotype (n= discs analysed)<br>(Mean $\pm$ Std Error M) | vs | Test Genotype (n)<br>(Mean $\pm$ Std Error M)                                              | Test                | p Value   |
|-----------------------------------------------------------------------------------------|----|--------------------------------------------------------------------------------------------|---------------------|-----------|
| <b>Graph (A) Glial density</b>                                                          |    |                                                                                            |                     |           |
| <i>UAS-rpr/+;GMR-Gal4 tub-Gal80<sup>ts</sup>/UAS-GFP</i> (39)<br>(0.019 $\pm$ 0.00045)  | vs | <i>GMR&gt;rpr dpp<sup>RNAi2</sup> hh<sup>RNAi</sup></i> (10)<br>(0.0166 $\pm$ 0.0004)      | One-Way ANOVA       | 0.01      |
| <i>UAS-rpr/+;GMR-Gal4 tub-Gal80<sup>ts</sup>/UAS-GFP</i> (39)<br>(0.019 $\pm$ 0.00045)  | vs | <i>GMR&gt;rpr dpp<sup>RNAi Int</sup> hh<sup>RNAi</sup></i> (17)<br>( 0.0162 $\pm$ 0.00049) | One-Way ANOVA       | 0.0003    |
| <i>GMR-Gal4 tub-Gal80<sup>ts</sup>/UAS-GFP</i> (47)<br>(0.0099 $\pm$ 0.00034)           | vs | <i>GMR&gt; dpp<sup>RNAi2</sup> hh<sup>RNAi</sup></i> (9)<br>(0.009 $\pm$ 0.0006)           | Mann-Whitney U-Test | ns (0.41) |
| <b>Graph (B) % PH3 glial cells</b>                                                      |    |                                                                                            |                     |           |
| <i>UAS-rpr/+;GMR-Gal4 tub-Gal80<sup>ts</sup>/UAS-GFP</i> (34)<br>(1.8 $\pm$ 0.1)        | vs | <i>GMR&gt;rpr dpp<sup>RNAi2</sup> hh<sup>RNAi</sup></i> (10)<br>(1.5 $\pm$ 0.19)           | One-Way ANOVA       | ns (0.48) |
| <i>UAS-rpr/+;GMR-Gal4 tub-Gal80<sup>ts</sup>/UAS-GFP</i> (34)<br>(1.8 $\pm$ 0.1)        | vs | <i>GMR&gt;rpr dpp<sup>RNAi Int</sup> hh<sup>RNAi</sup></i> (10)<br>(1.2 $\pm$ 0.2 )        | One-Way ANOVA       | 0.03      |
| <i>GMR-Gal4 tub-Gal80<sup>ts</sup>/UAS-GFP</i> (24)<br>(1.2 $\pm$ 0.13)                 | vs | <i>GMR&gt; dpp<sup>RNAi2</sup> hh<sup>RNAi</sup></i> (9)<br>(1.02 $\pm$ 0.1)               | Mann-Whitney U-Test | ns (0.33) |
| <b>Graph (C) Glial density</b>                                                          |    |                                                                                            |                     |           |
| <i>GMR-QF/+; QUAS-rpr repo-Gal4/+</i> (27)<br>(0.018 $\pm$ 0.0004)                      | vs | <i>GMR-QF&gt;rpr repo&gt;-Cf<sup>RNAi</sup></i> (12)<br>(0.0172 $\pm$ 0.008)               | One-Way ANOVA       | ns (0.79) |

|                                                                     |    |                                                                                    |                     |           |
|---------------------------------------------------------------------|----|------------------------------------------------------------------------------------|---------------------|-----------|
| <i>GMR-QF/+; QUAS-rpr repo-Gal4/+</i> (27)<br>(0.018± 0.0004)       | vs | <i>GMR-QF&gt;rpr repo&gt;-dad</i> (13)<br>(0.01± 0.0037)                           | One-Way ANOVA       | <0.0001   |
| <i>GMR-QF/+; QUAS-rpr repo-Gal4/+</i> (27)<br>(0.018± 0.0004)       | vs | <i>GMR-QF&gt;rpr repo&gt; Ci<sup>RNAi</sup> dad</i> (15)<br>(0.0091± 0.00079)      | One-Way ANOVA       | <0.0001   |
| <i>GMR-QF&gt;rpr repo&gt;-dad</i> (13)<br>(0.01± 0.0037)            | vs | <i>GMR-QF&gt;rpr repo&gt; Ci<sup>RNAi</sup> dad</i> (15)<br>(0.0091± 0.00079)      | Mann-Whitney U-Test | 0.0043    |
| <i>tub-Gal80<sup>ts</sup> repo-Gal4/+</i> (23)<br>(0.0094± 0.00037) | vs | <i>tub-Gal80<sup>ts</sup> repo&gt;-Ci<sup>RNAi</sup></i> (10)<br>(0.0067± 0.00031) | One-Way ANOVA       | <0.0001   |
| <i>tub-Gal80<sup>ts</sup> repo-Gal4/+</i> (23)<br>(0.0094± 0.00037) | vs | <i>tub-Gal80<sup>ts</sup> repo&gt;-dad</i> (13)<br>(0.0051± 0.00028)               | One-Way ANOVA       | <0.0001   |
| <b>Graph (D) % PH3 glial cells</b>                                  |    |                                                                                    |                     |           |
| <i>GMR-QF/+; QUAS-rpr repo-Gal4/+</i> (13)<br>(2.3± 0.23)           | vs | <i>GMR-QF&gt;rpr repo&gt;-Ci<sup>RNAi</sup></i> (11)<br>(2.25± 0.27)               | One-Way ANOVA       | ns (0.99) |
| <i>GMR-QF/+; QUAS-rpr repo-Gal4/+</i> (13)<br>(2.3± 0.23)           | vs | <i>GMR-QF&gt;rpr repo&gt;-dad</i> (11)<br>(1.07± 0.29)                             | One-Way ANOVA       | 0.0099    |
| <i>GMR-QF/+; QUAS-rpr repo-Gal4/+</i> (13)<br>(2.3± 0.23)           | vs | <i>GMR-QF&gt;rpr repo&gt; Ci<sup>RNAi</sup> dad</i> (16)<br>(1.098± 0.22)          | One-Way ANOVA       | 0.005     |
| <i>GMR-QF&gt;rpr repo&gt;-dad</i> (13)<br>(1.07± 0.29)              | vs | <i>GMR-QF&gt;rpr repo&gt; Ci<sup>RNAi</sup> dad</i> (16)<br>(1.098± 0.22)          | One-Way ANOVA       | ns(0.99)  |
| <i>tub-Gal80<sup>ts</sup> repo-Gal4/+</i> (23)<br>(1.64± 0.11)      | vs | <i>tub-Gal80<sup>ts</sup> repo&gt;Ci<sup>RNAi</sup></i> (10)<br>(1.72± 0.17)       | One-Way ANOVA       | ns(0.95)  |
| <i>tub-Gal80<sup>ts</sup> repo-Gal4/+</i> (23)<br>(1.64± 0.11)      | vs | <i>tub-Gal80<sup>ts</sup> repo&gt;dad</i> (13)<br>(0.98± 0.31)                     | One-Way ANOVA       | 0.04      |

**Table G****S18 Fig**

| Graph (panel) assay<br>Control Genotype (n= discs analysed)<br>(Mean $\pm$ Std Error M)                          | vs | Test Genotype (n)<br>(Mean $\pm$ Std Error M)                                              | Test          | p Value |
|------------------------------------------------------------------------------------------------------------------|----|--------------------------------------------------------------------------------------------|---------------|---------|
| <b>Graph (E) NO. glial cells / Area</b><br><i>GMR-Gal4 tub-Gal80<sup>ts</sup></i> (47)<br>(0.0099 $\pm$ 0.00034) | vs | <i>GMR-Gal4 tub-Gal80<sup>ts</sup>/+; UAS-dpp/+</i> (15)<br>(0.0122 $\pm$ 0.00045)         | One-way ANOVA | 0.0039  |
| <i>GMR-Gal4 tub-Gal80<sup>ts</sup></i> (47)<br>(0.0099 $\pm$ 0.00034)                                            | vs | <i>GMR-Gal4 tub-Gal80<sup>ts</sup>/UAS-hhGFP</i> (13)<br>(0.0099 $\pm$ 0.00028)            | One-way ANOVA | >0.99   |
| <i>GMR-Gal4 tub-Gal80<sup>ts</sup>/+</i> (47)<br>(0.0099 $\pm$ 0.00034)                                          | vs | <i>GMR-Gal4 tub-Gal80<sup>ts</sup>/UAS-hhGFP; UAS-dpp/+</i> (14)<br>(0.0145 $\pm$ 0.00079) | One-way ANOVA | <0.0001 |
| <i>GMR-Gal4 tub-Gal80<sup>ts</sup>/+; UAS-dpp/+</i> (15)<br>(0.0122 $\pm$ 0.00045)                               | vs | <i>GMR-Gal4 tub-Gal80<sup>ts</sup>/UAS-hhGFP</i> (13)<br>(0.0099 $\pm$ 0.00028)            | One-way ANOVA | 0.038   |
| <i>GMR-Gal4 tub-Gal80<sup>ts</sup>/+; UAS-dpp/+</i> (15)<br>(0.0122 $\pm$ 0.00045)                               | vs | <i>GMR-Gal4 tub-Gal80<sup>ts</sup>/UAS-hhGFP; UAS-dpp/+</i> (14)<br>(0.0145 $\pm$ 0.00079) | One-way ANOVA | 0.0461  |
| <i>GMR-Gal4 tub-Gal80<sup>ts</sup>/UAS-hhGFP</i> (13)<br>(0.0099 $\pm$ 0.00028)                                  | vs | <i>GMR-Gal4 tub-Gal80<sup>ts</sup>/UAS-hhGFP; UAS-dpp/+</i> (14)<br>(0.0145 $\pm$ 0.00079) | One-way ANOVA | <0.0001 |

|                                                                           |    |                                                                 |               |           |
|---------------------------------------------------------------------------|----|-----------------------------------------------------------------|---------------|-----------|
| <b>Graph (F) % PH3 glial cells</b>                                        |    |                                                                 |               |           |
| <i>GMR-Gal4 tub-Gal80<sup>ts</sup></i> (24)<br>(1.16±0.1387)              | vs | <i>GMR-Gal4 tub-Gal80<sup>ts</sup>/UAS-hhGFP; UAS-dpp/+</i> (9) | One-way ANOVA | 0.0003    |
| <i>GMR-Gal4 tub-Gal80<sup>ts/+}</sup></i> (24)<br>(1.16±0.1387)           | vs | <i>GMR-Gal4 tub-Gal80<sup>ts/+}; UAS-dpp/+</sup></i> (15)       | One-way ANOVA | ns (0.57) |
| <i>GMR-Gal4 tub-Gal80<sup>ts/+}</sup></i> (24)<br>(1.16±0.1387)           | vs | <i>GMR-Gal4 tub-Gal80<sup>ts</sup>/UAS-hhGFP</i> (13)           | One-way ANOVA | ns (0.86) |
| <i>GMR-Gal4 tub-Gal80<sup>ts/+}; UAS-dpp/+</sup></i> (15)<br>(1.4±0.2356) | vs | <i>GMR-Gal4 tub-Gal80<sup>ts</sup>/UAS-hhGFP; UAS-dpp/+</i> (9) | One-way ANOVA | 0.0186    |
| <i>GMR-Gal4 tub-Gal80<sup>ts</sup>/UAS-hhGFP</i> (13)<br>(1.34±0.0913)    | vs | <i>GMR-Gal4 tub-Gal80<sup>ts</sup>/UAS-hhGFP; UAS-dpp/+</i> (9) | One-way ANOVA | 0.0087    |

## Table H

### S20 Fig

| Graph (panel) assay<br>Control Genotype (n= discs analysed)<br>(Mean ± Std Error M) | vs   | Test Genotype (n)<br>(Mean ± Std Error M)                                | Test          | p Value   |
|-------------------------------------------------------------------------------------|------|--------------------------------------------------------------------------|---------------|-----------|
| <b>Graph (E) % glia cells expressing pucZ2B</b>                                     |      |                                                                          |               |           |
| <i>GMR-Gal4 tub-Gal80<sup>ts/+}; pucZ2B</sup></i> (13)<br>(17.39±1)                 | vs + | <i>GMR-Gal4 tub-Gal80<sup>ts</sup>/UAS-hh ;pucZ2B</i> (5)<br>(21.03±2.9) | One-Way ANOVA | ns (0.56) |
| <i>GMR-Gal4 tub-Gal80<sup>ts/+}; pucZ2B</sup></i> (13)                              | vs + | <i>GMR-Gal4 tub-Gal80<sup>ts</sup>/+ ;pucZ2B/UAS-dpp</i> (9)             | One-Way ANOVA | 0.0036    |



|                                                                     |                                                                                        |               |          |
|---------------------------------------------------------------------|----------------------------------------------------------------------------------------|---------------|----------|
| (17.39±1)                                                           | (25.9±1.9)                                                                             |               |          |
| <i>GMR-Gal4 tub-Gal80<sup>ts</sup>/+; pucZ2B</i> (13)<br>(17.39±1)  | vs + <i>GMR-Gal4 tub-Gal80<sup>ts</sup>/UAS-hh ;pucZ2B/UAS-dpp</i> (12)<br>(24.29±1.6) | One-Way ANOVA | 0.012    |
| <b>High levels</b>                                                  |                                                                                        |               |          |
| <i>GMR-Gal4 tub-Gal80<sup>ts</sup>/+; pucZ2B</i> (11)<br>(5.4±0.99) | vs + <i>GMR-Gal4 tub-Gal80<sup>ts</sup>/UAS-hh ;pucZ2B</i> (5)<br>(7.6±0.95)           | One-Way ANOVA | ns (0.8) |
| <i>GMR-Gal4 tub-Gal80<sup>ts</sup>/+; pucZ2B</i> (11)<br>(5.4±0.99) | vs + <i>GMR-Gal4 tub-Gal80<sup>ts</sup>/+ ;pucZ2B/UAS-dpp</i> (9)<br>(11.02±1.67)      | One-Way ANOVA | 0.047    |
| <i>GMR-Gal4 tub-Gal80<sup>ts</sup>/+; pucZ2B</i> (11)<br>(5.4±0.99) | vs + <i>GMR-Gal4 tub-Gal80<sup>ts</sup>/UAS-hh ;pucZ2B/UAS-dpp</i> (11)<br>(14.90±1.7) | One-Way ANOVA | 0.0002   |

## Table I

### S22 Fig

| Graph (panel) assay<br>Control Genotype (n= discs analysed)<br>(Mean ± Std Error M)                   | vs | Test Genotype (n)<br>(Mean ± Std Error M)     | Test          | p Value |
|-------------------------------------------------------------------------------------------------------|----|-----------------------------------------------|---------------|---------|
| <b>Graph (I) NO. glial cells</b><br><i>Control hh-Gal4 tub-Gal80<sup>ts</sup></i> (43)<br>(100.2±4.5) | vs | <i>hep<sup>r75</sup></i> (26)<br>(75.23±4.59) | One-way ANOVA | 0.026   |

|                                                                   |    |                                                                                    |               |         |
|-------------------------------------------------------------------|----|------------------------------------------------------------------------------------|---------------|---------|
| Control <i>hh-Gal4 tub-Gal80<sup>ts</sup></i> (43)<br>(100.2±4.5) | vs | <i>rpr; hh-Gal4 tub-Gal80<sup>ts</sup></i> (12)<br>(163±18.73)                     | One-way ANOVA | <0.0001 |
| <i>rpr; hh-Gal4 tub-Gal80<sup>ts</sup></i> (12)<br>(163±18.73)    | vs | <i>hep<sup>r75</sup>; rpr; hh-Gal4 tub-Gal80<sup>ts</sup></i> (11)<br>(96.91±8.87) | One-way ANOVA | 0.0001  |

**Table J**

**S25 Fig**

| Graph (panel) assay<br>Control Genotype (n= discs analysed)<br>(Mean ± Std Error M)                     | vs | Test Genotype (n)<br>(Mean ± Std Error M)                                   | Test          | p Value    |
|---------------------------------------------------------------------------------------------------------|----|-----------------------------------------------------------------------------|---------------|------------|
| <b>Graph (J) NO. glial cells</b><br><i>Control Dll-Gal4 tub-Gal80<sup>ts</sup></i> (60)<br>(102.2±4.07) | vs | <i>dpp<sup>d12</sup>/dpp<sup>d14</sup></i> (11)<br>(47.27±4.21)             | One-way ANOVA | <0.0001    |
| <i>Control Dll-Gal4 tub-Gal80<sup>ts</sup></i> (60)<br>(102.2±4.07)                                     | vs | <i>Dll&gt;dpp<sup>RNAi</sup></i> (16)<br>(78.06±8.56)                       | One-way ANOVA | ns (0.11)  |
| <i>Control Dll-Gal4 tub-Gal80<sup>ts</sup></i> (60)<br>(102.2±4.07)                                     | vs | <i>Dll&gt;hh<sup>RNAi</sup></i> (13)<br>(97.46±6.29)                        | One-way ANOVA | ns (>0.99) |
| <i>Control Dll-Gal4 tub-Gal80<sup>ts</sup></i> (60)<br>(102.2±4.07)                                     | vs | <i>Dll&gt;rpr dpp<sup>RNAi</sup></i> (17)<br>(105±7.54)                     | One-way ANOVA | ns (0.99)  |
| <i>Control Dll-Gal4 tub-Gal80<sup>ts</sup></i> (60)<br>(102.2±4.07)                                     | vs | <i>Dll&gt;rpr hh<sup>RNAi</sup> dpp<sup>RNAi</sup></i> (12)<br>(92.42±5.89) | One-way ANOVA | ns (0.99)  |

|                                                                        |    |                                                                             |               |            |
|------------------------------------------------------------------------|----|-----------------------------------------------------------------------------|---------------|------------|
| <i>Control Dll-Gal4 tub-Gal80<sup>ts</sup></i> (60)<br>(102.2±4.07)    | vs | <i>Dll&gt;rpr GFP</i> (25)<br>(146.2±5.94)                                  | One-way ANOVA | <0.0001    |
| <i>Control Dll-Gal4 tub-Gal80<sup>ts</sup></i> (60)<br>(102.2±4.07)    | vs | <i>hh&gt;rpr</i> (24)<br>(161.5±8.03)                                       | One-way ANOVA | <0.0001    |
| <i>Control Dll-Gal4 tub-Gal80<sup>ts</sup></i> (60)<br>(102.2±4.07)    | vs | <i>hh&gt;rpr dpp<sup>d12</sup>/dpp<sup>d14</sup></i> (13)<br>(57.85±5.9)    | One-way ANOVA | <0.0001    |
| <i>Dll&gt;rpr GFP</i> (25)<br>(146.2±5.94)                             | vs | <i>Dll&gt;rpr dpp<sup>RNAi</sup></i> (17)<br>(105±7.54)                     | One-way ANOVA | 0.0001     |
| <i>Dll&gt;rpr GFP</i> (25)<br>(146.2±5.94)                             | vs | <i>Dll&gt;rpr hh<sup>RNAi</sup> dpp<sup>RNAi</sup></i> (12)<br>(92.42±5.89) | One-way ANOVA | <0.0001    |
| <i>hh&gt;rpr</i> (24)<br>(161.5±8.03)                                  | vs | <i>hh&gt;rpr dpp<sup>d12</sup>/dpp<sup>d14</sup></i> (13)<br>(57.85±5.9)    | One-way ANOVA | <0.0001    |
| <b>Graph (K) % PH3 glial cells</b>                                     |    |                                                                             |               |            |
| <i>Control Dll-Gal4 tub-Gal80<sup>ts</sup></i> (17)<br>(0.4767±0.1313) | vs | <i>dpp<sup>d12</sup>/dpp<sup>d14</sup></i> (10)<br>(0.5865±0.3080)          | One-way ANOVA | ns (0.99)  |
| <i>Control Dll-Gal4 tub-Gal80<sup>ts</sup></i> (17)<br>(0.4767±0.1313) | vs | <i>Dll&gt;dpp<sup>RNAi</sup></i> (16)<br>(1.104±0.02501)                    | One-way ANOVA | ns (0.34)  |
| <i>Control Dll-Gal4 tub-Gal80<sup>ts</sup></i> (17)<br>(0.4767±0.1313) | vs | <i>Dll&gt;hh<sup>RNAi</sup></i> (12)<br>(0.9294±0.3343)                     | One-way ANOVA | ns (>0.76) |
| <i>Control Dll-Gal4 tub-Gal80<sup>ts</sup></i> (17)<br>(0.4767±0.1313) | vs | <i>Dll&gt;rpr</i> (15)<br>(0.732±0.1514)                                    | One-way ANOVA | ns (>0.96) |

**Table K**

**S26 Fig**

| Graph (panel) assay<br>Control Genotype (n= discs analysed)<br>(Mean $\pm$ Std Error M)                       | vs | Test Genotype (n)<br>(Mean $\pm$ Std Error M)                                            | Test          | p Value   |
|---------------------------------------------------------------------------------------------------------------|----|------------------------------------------------------------------------------------------|---------------|-----------|
| <b>Graph (H) NO. glial cells</b><br><i>Control Dll-Gal4 tub-Gal80<sup>ts</sup></i> (60)<br>(102.2 $\pm$ 4.07) | vs | <i>Dll-Gal4 tub-Gal80<sup>ts</sup>; UAS-dpp/+</i> (22)<br>(190.6 $\pm$ 11.37)            | One-way ANOVA | <0.0001   |
| <i>Control Dll-Gal4 tub-Gal80<sup>ts</sup></i> (60)<br>(102.2 $\pm$ 4.07)                                     | vs | <i>Dll-Gal4 tub-Gal80<sup>ts</sup>; UAS-hhGFP /+</i> (14)<br>(83.5 $\pm$ 6.14)           | One-way ANOVA | ns (0.87) |
| <i>Control Dll-Gal4 tub-Gal80<sup>ts</sup></i> (60)<br>(102.2 $\pm$ 4.07)                                     | vs | <i>Dll-Gal4 tub-Gal80<sup>ts</sup>; UAS-hhGFP; UAS-dpp/+</i> (11)<br>(199.8 $\pm$ 27.85) | One-way ANOVA | <0.0001   |
| <i>Control Dll-Gal4 tub-Gal80<sup>ts</sup></i> (60)<br>(102.2 $\pm$ 4.07)                                     | vs | <i>UAS-ihog/+; repo-Gal4/+</i> (17)<br>(111.4 $\pm$ 6.3)                                 | One-way ANOVA | ns (0.99) |
| <i>Control Dll-Gal4 tub-Gal80<sup>ts</sup></i> (60)<br>(102.2 $\pm$ 4.07)                                     | vs | <i>repo-Gal4/UAS-tkv<sup>QD</sup></i> (13)<br>(199.5 $\pm$ 16.36)                        | One-way ANOVA | <0.0001   |
| <i>Control Dll-Gal4 tub-Gal80<sup>ts</sup></i> (60)<br>(102.2 $\pm$ 4.07)                                     | vs | <i>UAS-ihog/+; repo-Gal4/UAS-tkv<sup>QD</sup></i> (11)<br>(192.3 $\pm$ 30.77)            | One-way ANOVA | <0.0001   |
| <i>Dll-Gal4 tub-Gal80<sup>ts</sup>; UAS-dpp/+</i> (22)<br>(190.6 $\pm$ 11.37)                                 | vs | <i>Dll-Gal4 tub-Gal80<sup>ts</sup>; UAS-hhGFP</i> (14)<br>(83.5 $\pm$ 6.14)              | One-way ANOVA | <0.0001   |

|                                                                         |    |                                                                                   |               |           |
|-------------------------------------------------------------------------|----|-----------------------------------------------------------------------------------|---------------|-----------|
| <i>Dll-Gal4 tub-Gal80<sup>ts</sup>; UAS-dpp/+</i> (22)<br>(190.6±11.37) | vs | <i>Dll-Gal4 tub-Gal80<sup>ts</sup>/UAS-hhGFP; UAS-dpp/+</i> (11)<br>(199.8±27.85) | One-way ANOVA | ns (0.99) |
| <i>repo-Gal4/UAS-tkv<sup>QD</sup></i> (13)<br>(199.5±16.36)             | vs | <i>UAS-ihog/+; repo-Gal4/+</i> (17)<br>(111.4±6.3)                                | One-way ANOVA | <0.0001   |
| <i>repo-Gal4/UAS-tkv<sup>QD</sup></i> (13)<br>(199.5±16.36)             | vs | <i>UAS-ihog/+; repo-Gal4/UAS-tkv<sup>QD</sup></i> (11)<br>(192.3±30.77)           | One-way ANOVA | ns (0.99) |
| <b>Graph (I) % PH3 glial cells</b>                                      |    |                                                                                   |               |           |
| <i>Control Dll-Gal4 tub-Gal80<sup>ts</sup></i> (17)<br>(0.4767±0.1313)  | vs | <i>Dll-Gal4 tub-Gal80<sup>ts</sup>; UAS-dpp/+</i> (5)<br>(0.52±0.15)              | One-way ANOVA | ns (0.99) |
| <i>Control Dll-Gal4 tub-Gal80<sup>ts</sup></i> (17)<br>(0.4767±0.1313)  | vs | <i>Dll-Gal4 tub-Gal80<sup>ts</sup>/UAS-hhGFP</i> (14)<br>(0.42±0.17)              | One-way ANOVA | ns (0.99) |
| <i>Control Dll-Gal4 tub-Gal80<sup>ts</sup></i> (17)<br>(0.4767±0.1313)  | vs | <i>Dll-Gal4 tub-Gal80<sup>ts</sup>/UAS-hhGFP; UAS-dpp/+</i> (9)<br>(0.42±0.17)    | One-way ANOVA | ns (0.99) |
| <i>Control Dll-Gal4 tub-Gal80<sup>ts</sup></i> (17)<br>(0.4767±0.1313)  | vs | <i>repo-Gal4/UAS-tkv<sup>QD</sup></i> (13)<br>(1.122±0.1332)                      | One-way ANOVA | 0.016     |
